# Supplementary material for: The Complete Mitochondrial Genome of Corizus tetraspilus (Hemiptera: Rhopalidae) and Phylogenetic Analysis of Pentatomomorpha
Source: PubMed Central journal article supplement (PMC4456165; doi:10.1371/journal.pone.0129003), 2015-06-04

**First codon position**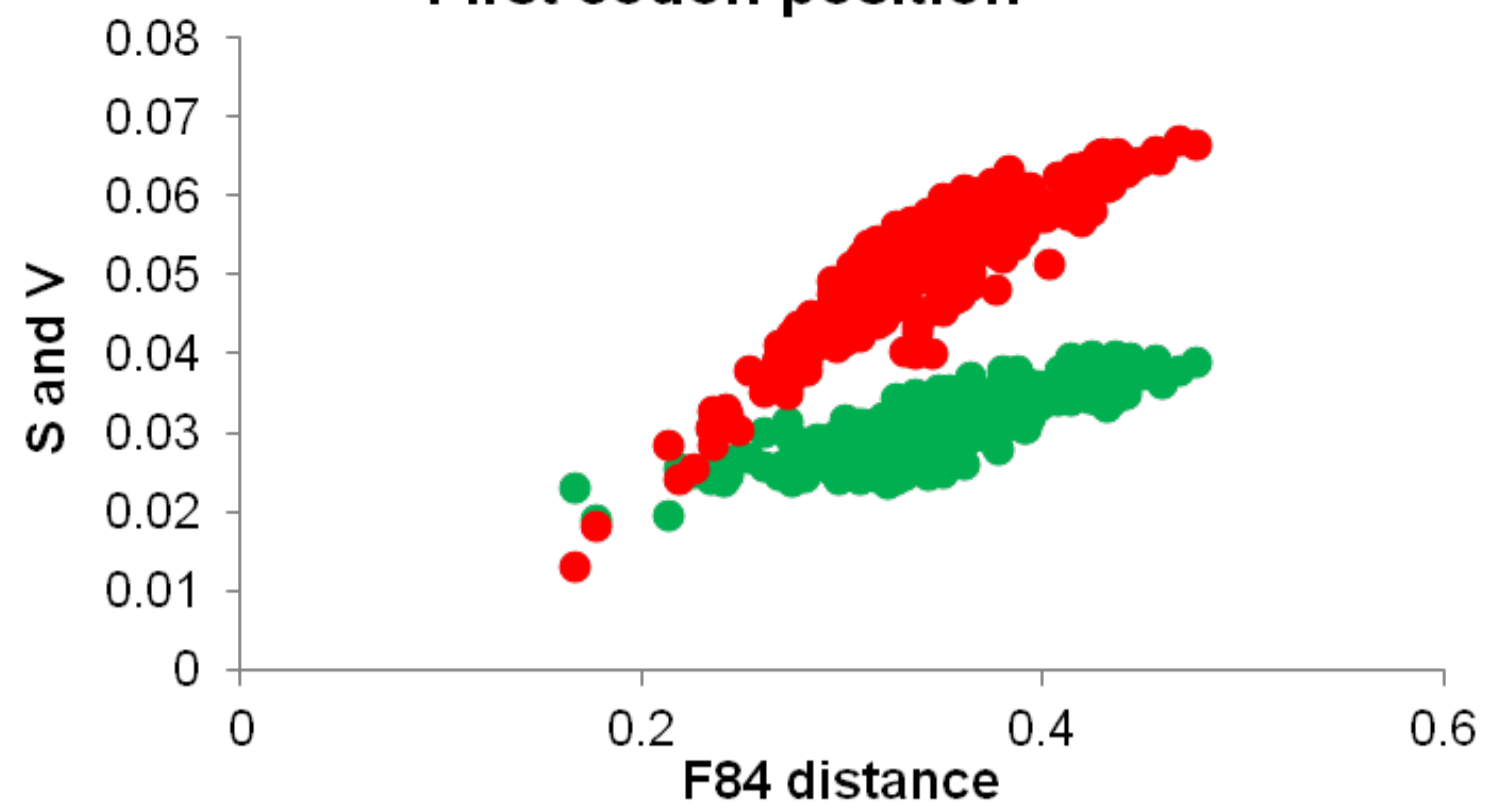**Second codon position**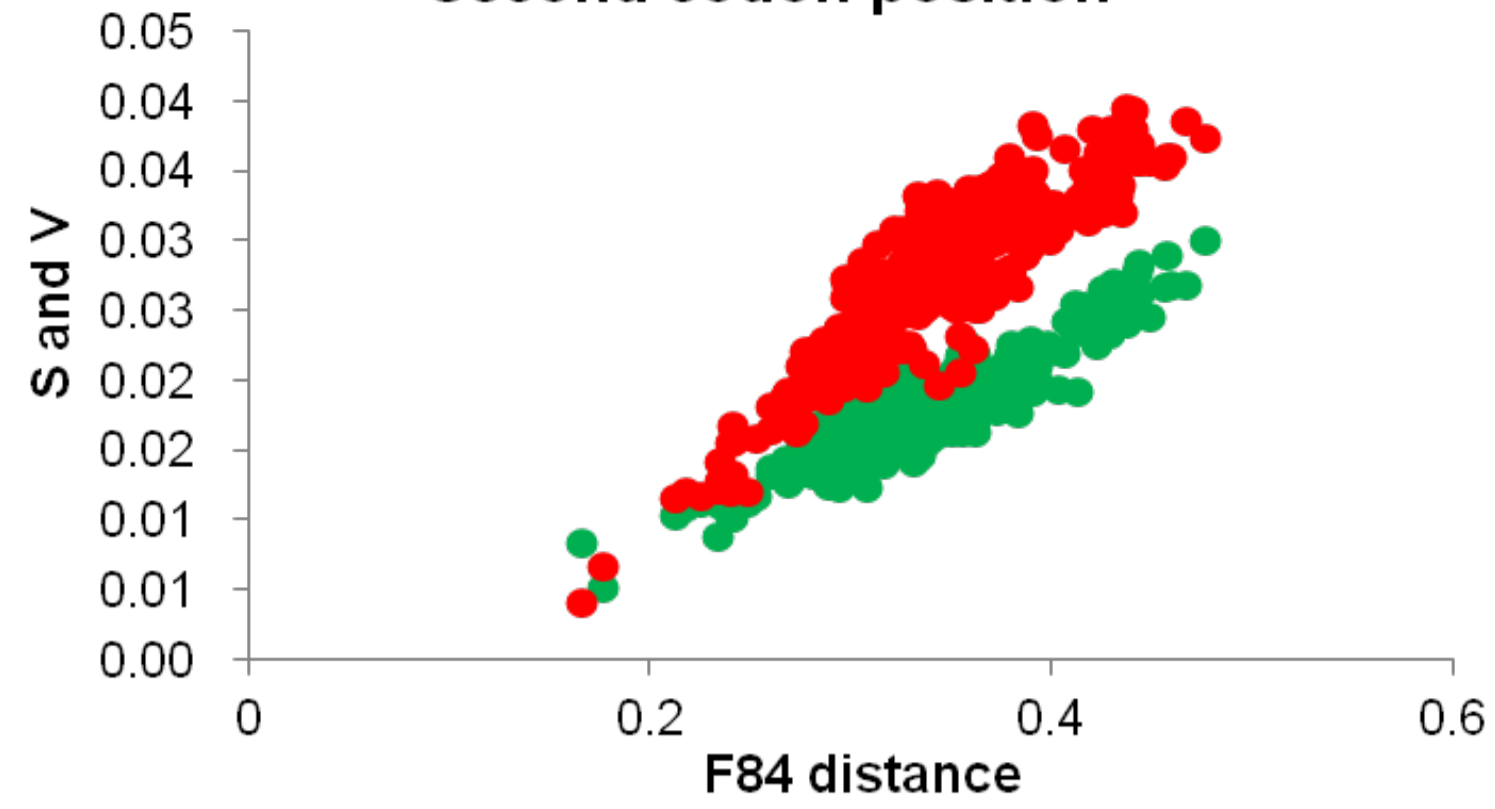**Third codon position**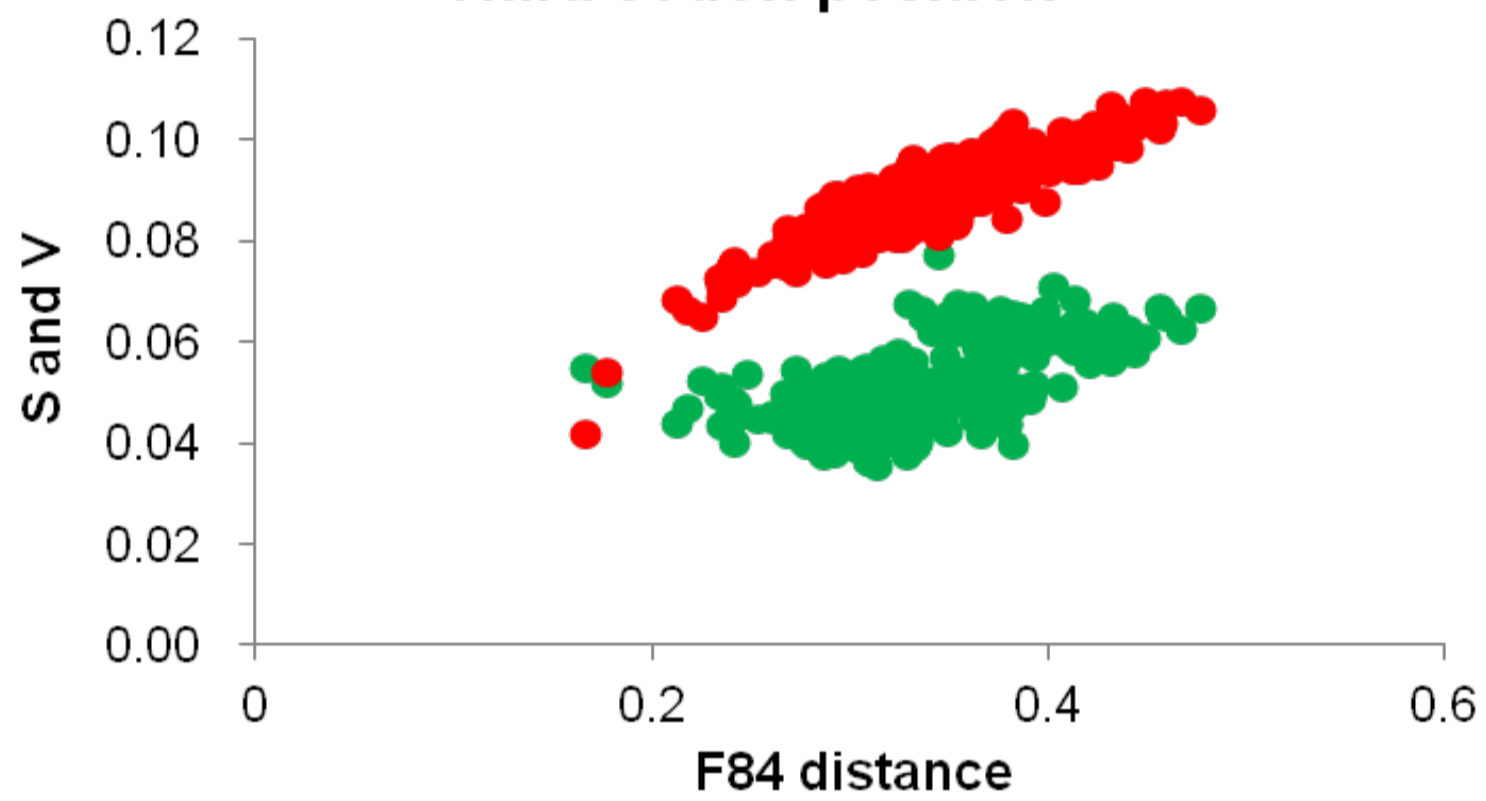**three codon positions**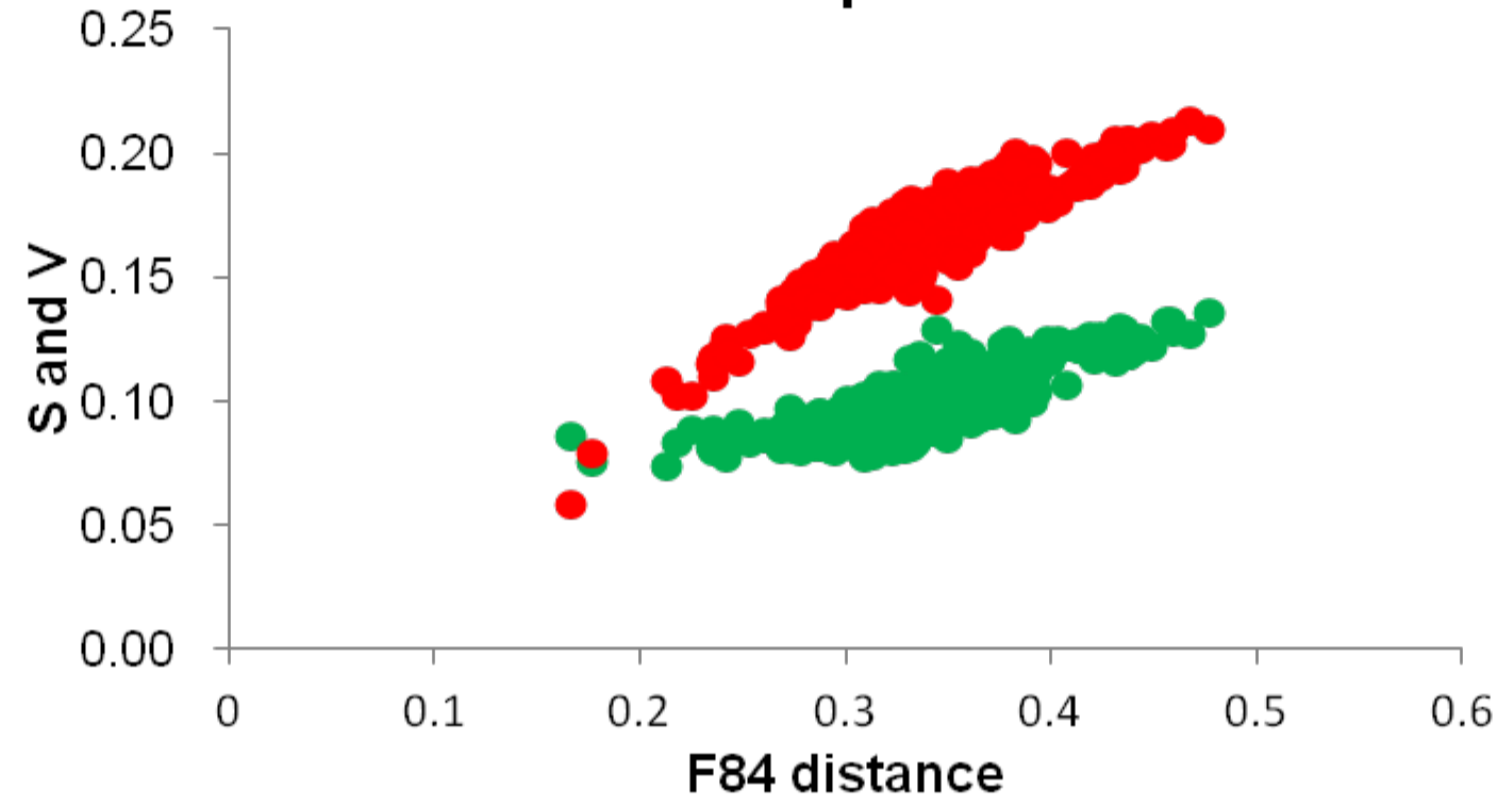*rrnL*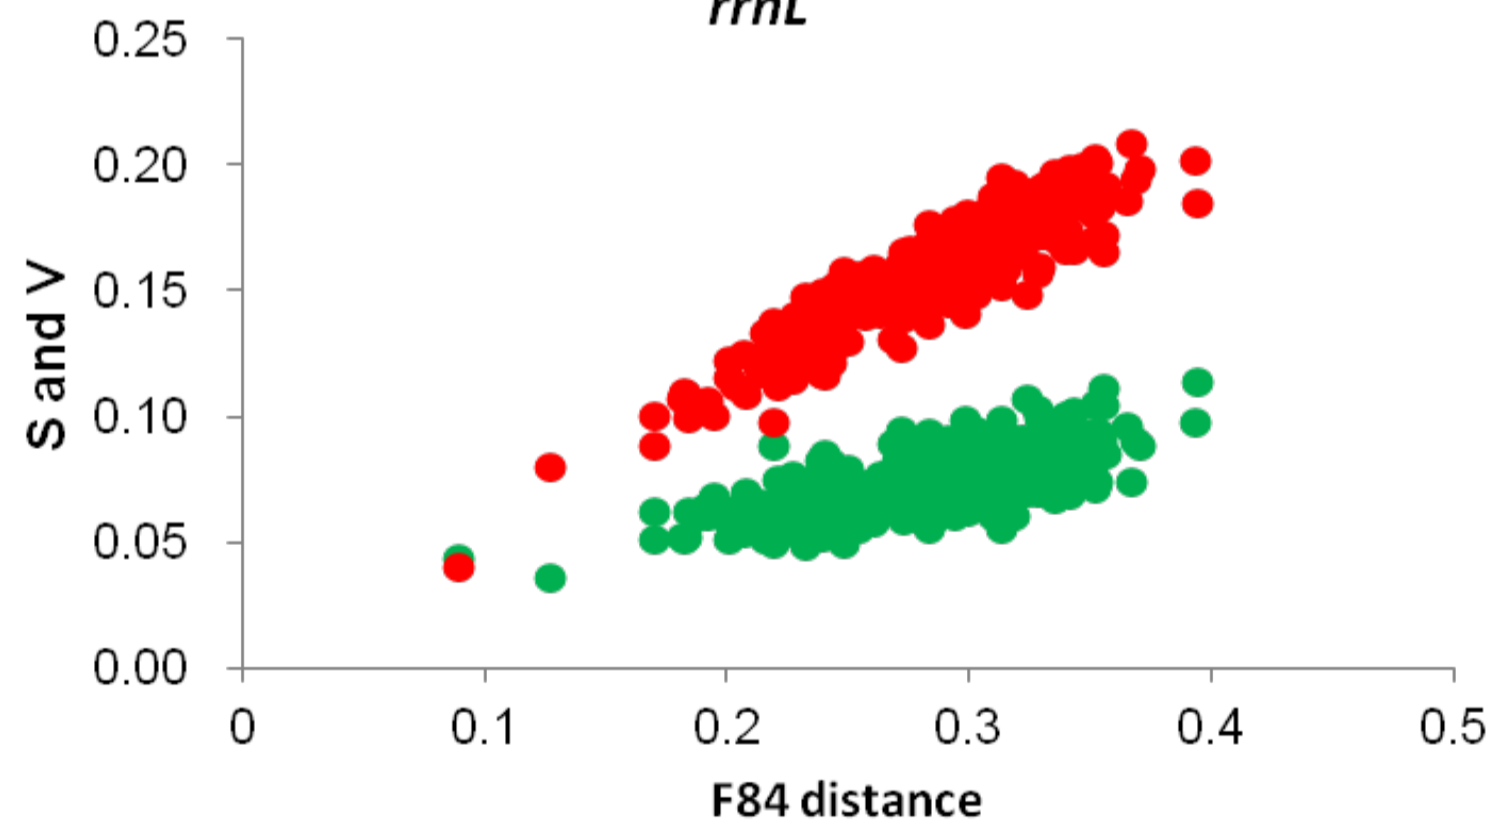*rrnS*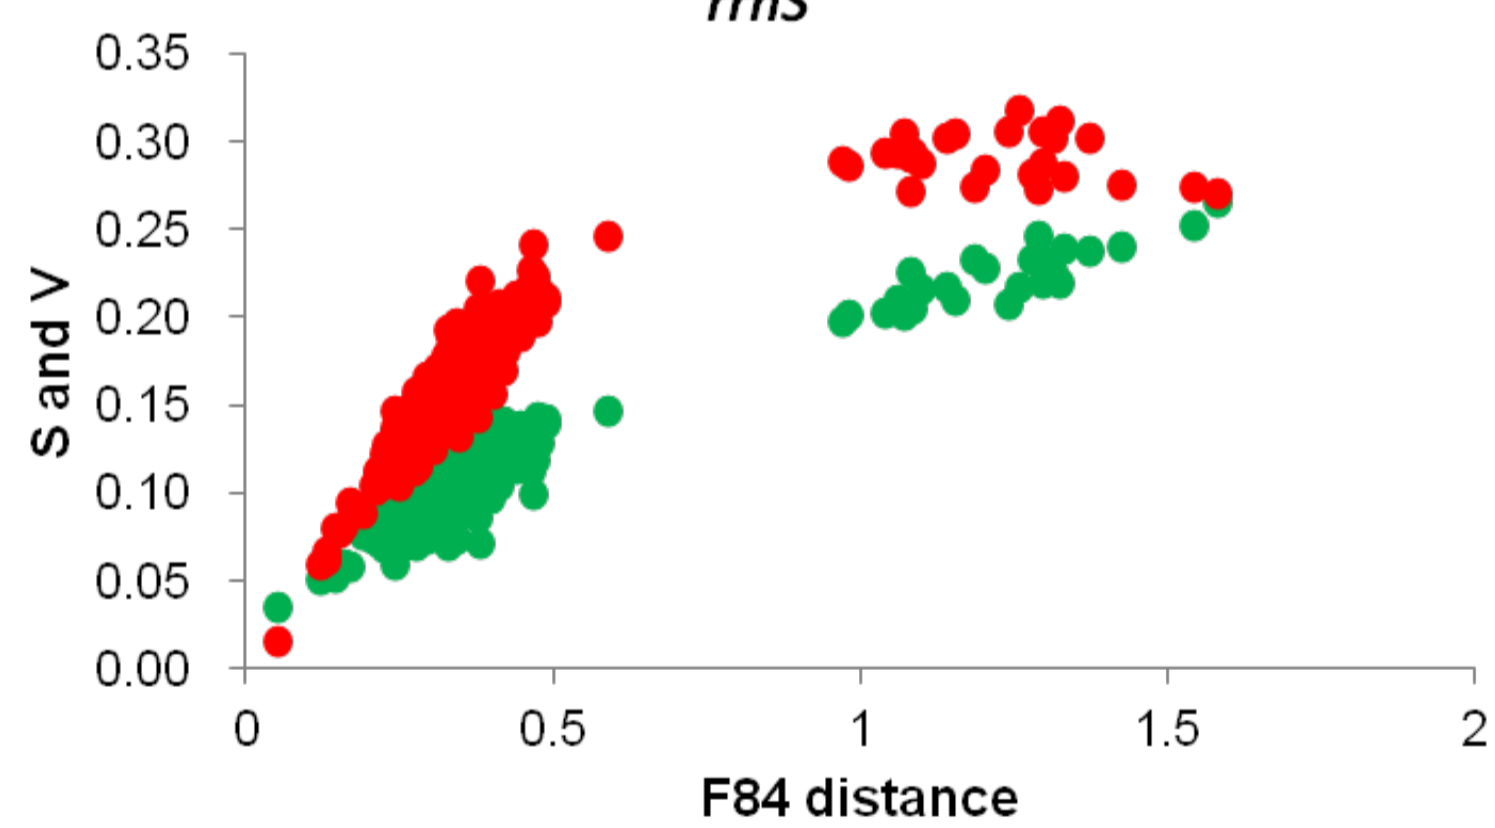**tRNA**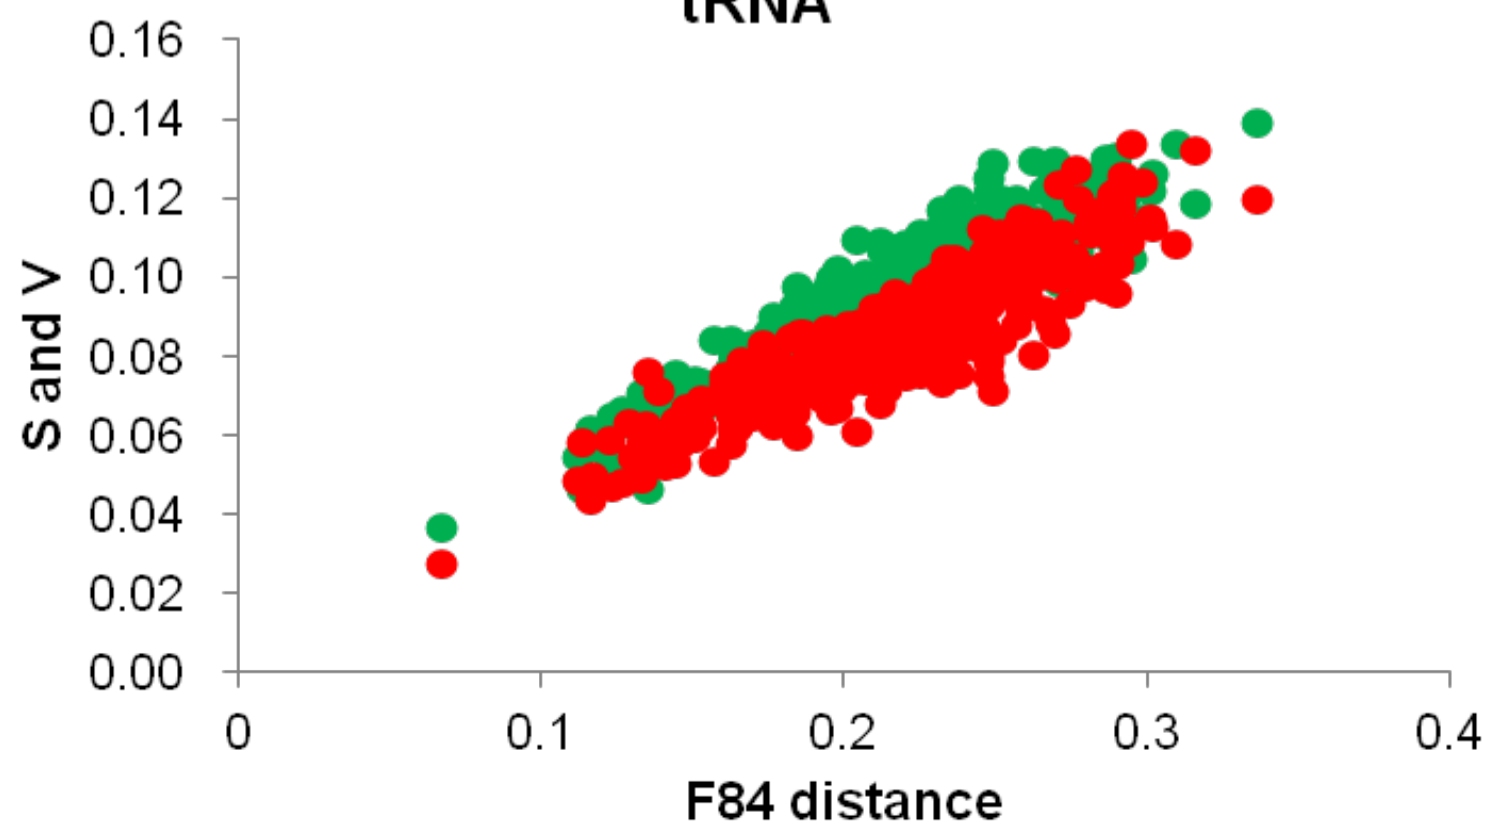

Supplement: pone.0129003.s001.pdf [file pone.0129003.s001.pdf]
